# Supplementary material for: Pollutant capturing SERS substrate: porous boron nitride microfibers with uniform silver nanoparticle decoration
Source: Royal Society of Chemistry journal article supplement (doi:10.1039/c5nr05625j), 2015-01-01
Supplement: c5nr05625j1.pdf [file c5nr05625j1.pdf]

## Supporting Information

### **Pollutant capturing SERS substrate: Porous boron nitride microfibers with uniform silver nanoparticles decoration**

*Pengcheng Dai\*, Yanming Xue\*, Qunhong Weng, Chao Zhang, Xuebin Wang, Xiangfen Jiang\*, Xi Wang, Naoyuki Kawamoto, Yusuke Ide, Masanori Mitome, Dmitri Golberg\*, Yoshio Bando*

#### **Content**

1. **Fig. S1** XPS spectra of BN microfibers.
2. **Fig. S2** XPS spectra of BN microfibers with Ag<sup>+</sup> absorbed on their surface.
3. **Fig. S3** XPS spectra of BN microfibers with Ag nanoparticles on their surface.
4. **Fig. S4** Low magnification SEM images of M2B precursor, BN microfibers and BN/Ag hybrids.
5. **Fig. S5** TEM images of Ag nanoparticles with different sizes and shapes on BN microfibers.
6. **Fig. S6** TEM images of two other parts of Ag nanoparticle-decorated BN microfibers and the size distribution of Ag nanoparticles.
7. **Fig. S7** Nitrogen adsorption-desorption isotherms of BN microfibers and Ag-decorated BN microfibers.
8. **Fig. S8** UV-vis spectra of RhB solutions with different concentrations.
9. **Fig. S9** UV-vis spectra of RhB solutions after BN/Ag adsorption.
10. **Fig. S10** Raman spectra of the solutions with the same amount of MB but at different concentrations and volumes.
11. **Fig. S11** Raman spectra of RhB (10<sup>-6</sup> M) on ten different parts of BN/Ag membrane before and after reusability test.
12. **Fig. S12** Adsorption capacities and SERS activities of BN, BN/Ag and Ag NPs.

1.

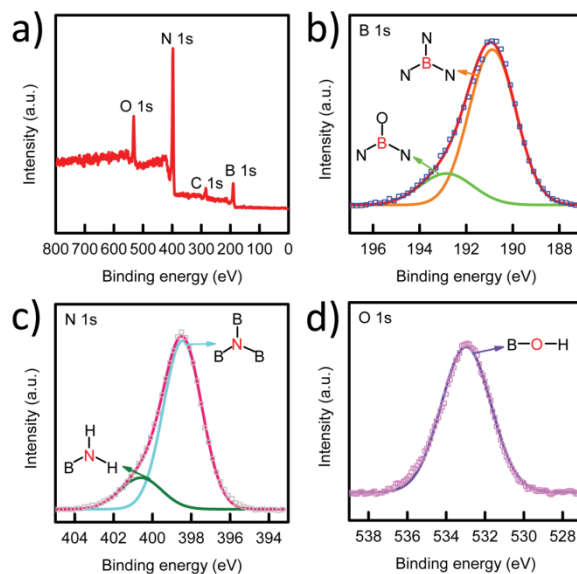

**Fig. S1** XPS spectra of BN microfibers. (a) Survey spectrum indicates the presence of B, N, C and O. (b) B 1s spectrum. The main  $sp^2$ -hybridized BN structure shows a peak at 190.8 eV, while a shoulder peak located at 192.7 eV is attributed to the edge or interfacial BN structures linked with -OH. (c) N 1s spectrum. Besides the main  $sp^2$ -hybridized BN structures, the shoulder peak located at 400.5 eV belongs to the surface -NH- or -NH<sub>2</sub> groups (d) O 1s spectrum. O 1s peak at 533.0 eV can be fitted to hydroxyl.

2.

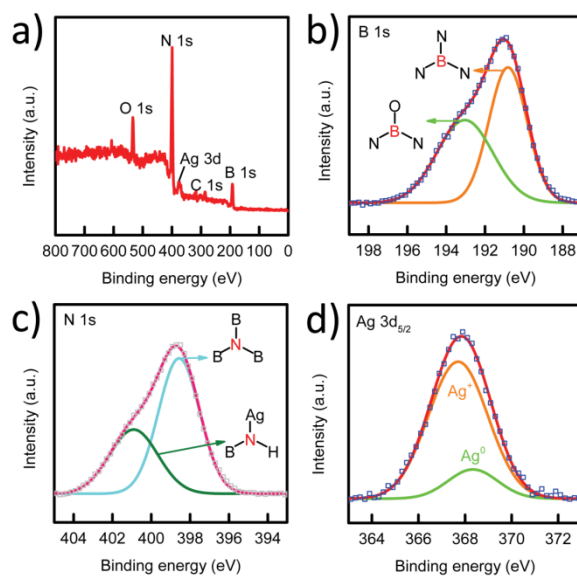

**Fig. S2** XPS spectra of BN microfibers with  $\text{Ag}^+$  absorbed on their surface. (a) Survey spectrum indicates the presence of B, N, C, O and Ag. (b) B 1s spectrum. The main  $\text{sp}^2$ -hybridized BN structure shows a peak at 190.8 eV, while a shoulder peak located at 192.7 eV is attributed to the edge or interfacial BN structures linked with  $-\text{OH}$ . (c) N 1s spectrum. Besides the main  $\text{sp}^2$ -hybridized BN structures, the shoulder peak located at 401.0 eV belongs to the surface  $-\text{NH}-$  or  $-\text{NH}_2$  groups linked with  $\text{Ag}^+$ . (d) Ag 3d<sub>5/2</sub> spectrum. Peaks at 367.7 eV and 368.4 eV are attributed to  $\text{Ag}^+$  and  $\text{Ag}^0$ , respectively. Judging from the peak area, the main chemical state of silver is  $\text{Ag}^+$ .

3.

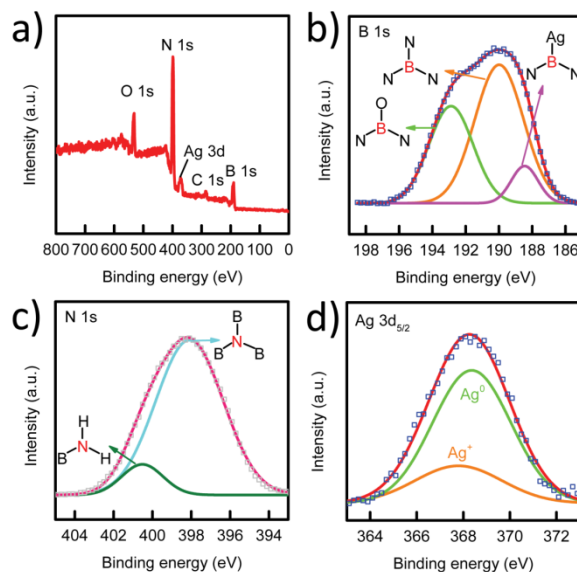

**Fig. S3** XPS spectra of BN microfibers with Ag nanoparticles on their surface. (a) Survey spectrum indicates the presence of B, N, C, O and Ag. (b) B 1s spectrum. The main  $sp^2$ -hybridized BN structure shows a peak at 190.8 eV, while a shoulder peak located at 192.7 eV is attributed to the edge or interfacial BN structures linked with  $-OH$ . A third peak fitted at 188.4 eV usually presents in boride, which we attributed to the contact of B and Ag. (c) N 1s spectrum. Besides the main  $sp^2$ -hybridized BN structures, the shoulder peak located at 401 eV belongs to the surface  $-NH-$  or  $-NH_2$  groups. (d) Ag  $3d_{5/2}$  spectrum. Peaks at 367.7 eV and 368.4 eV are attributed to  $Ag^+$  and  $Ag^0$ , respectively. Most of the  $Ag^+$  has transformed into metallic silver, as judged from the peak areas of  $Ag^+$  and  $Ag^0$ .

4.

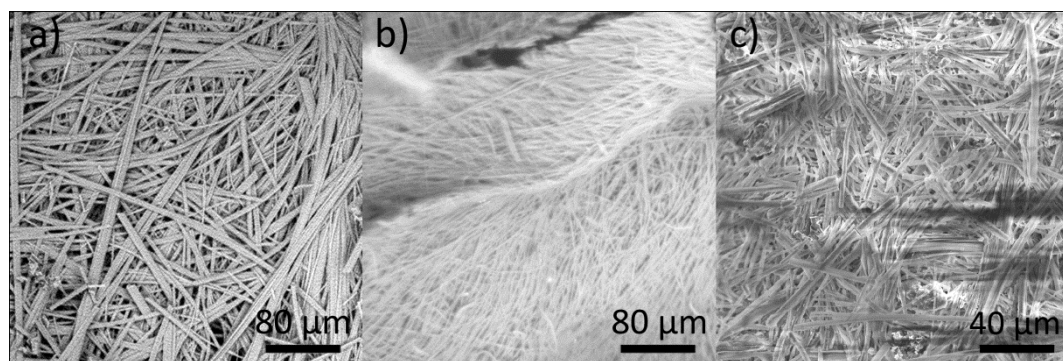

**Fig. S4** Low-magnification SEM images of a) M2B precursor b) BN microfibers and c) BN/Ag hybrids.

5.

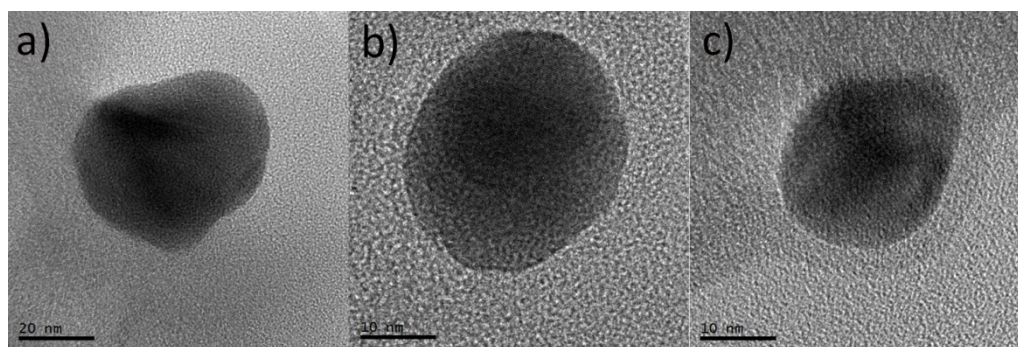

**Fig. S5** TEM images of Ag nanoparticles with different sizes and shapes on a BN microfiber.

6.

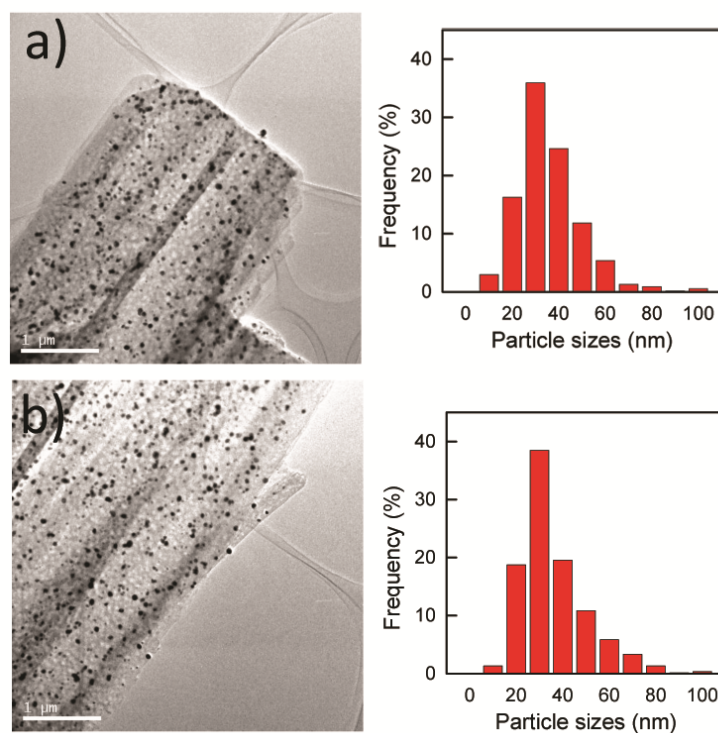

**Fig. S6** TEM images of the other two parts of Ag nanoparticle-decorated BN microfibers and the size distribution of Ag nanoparticles.

7.

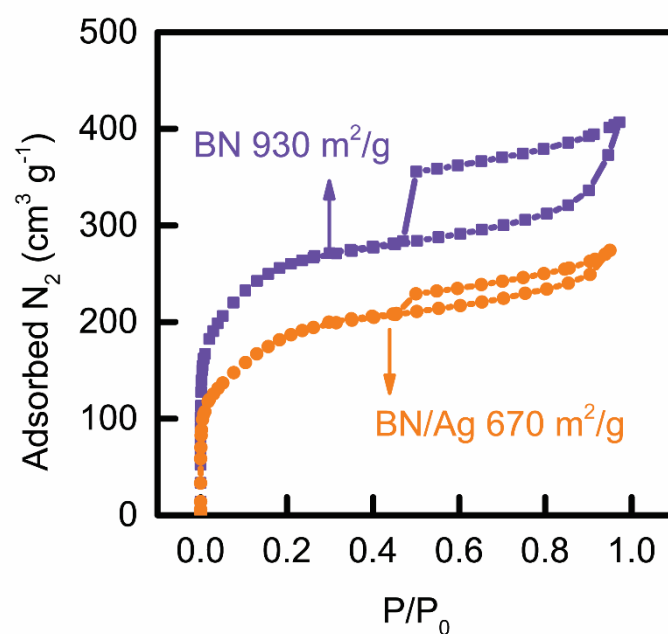

**Fig. S7** Nitrogen adsorption-desorption isotherms of BN microfibers and Ag-decorated BN microfibers. Bare BN microfibers hold a high specific surface area of 930 m<sup>2</sup>/g. The loaded Ag nanoparticles occupied some holes within BN microfibers and, therefore, the resultant specific surface area decreased to 670 m<sup>2</sup>/g.

8.

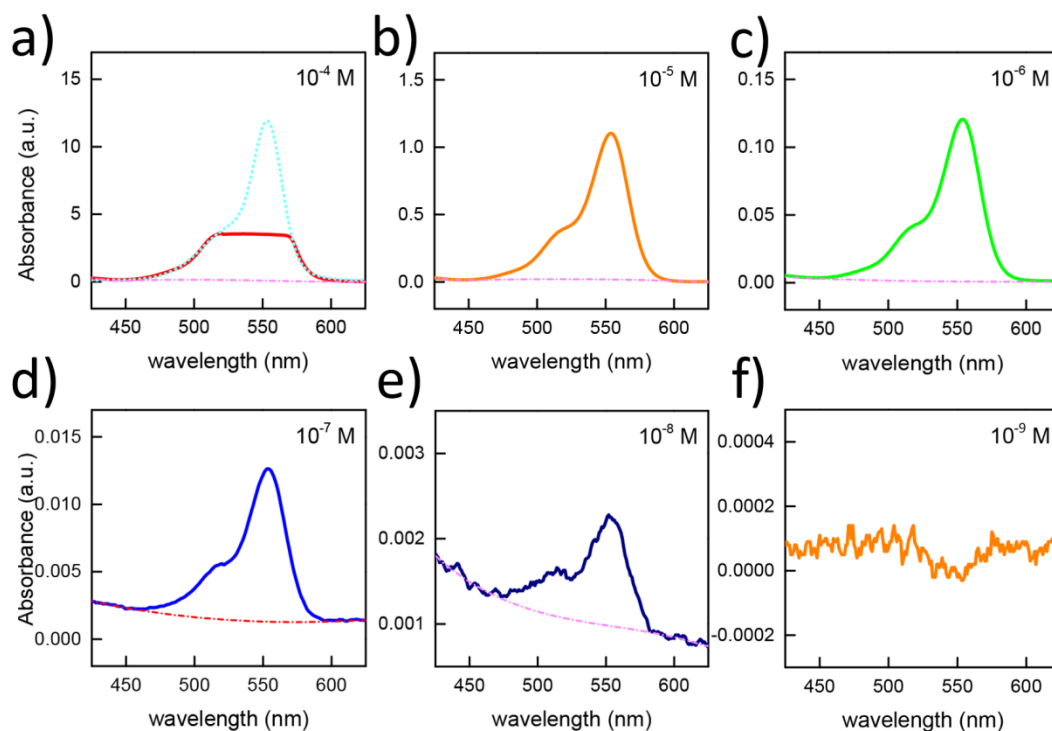

**Fig. S8** UV-vis spectra of RhB solutions whose concentrations are  $10^{-4}$  M,  $10^{-5}$  M,  $10^{-6}$  M,  $10^{-7}$  M,  $10^{-8}$  M and  $10^{-9}$  M.  $10^{-4}$  M RhB solution is so concentrated that it generates a flat peak tip. Therefore, we fit the curve to get the peak. RhB solutions of  $10^{-5}$  M,  $10^{-6}$  M,  $10^{-7}$  M and  $10^{-8}$  M show a characteristic peak at 552 nm.  $10^{-9}$  M RhB solution concentration is too low to be detected by UV-vis spectra. The dot-dash lines are baselines which are subtracted.

9.

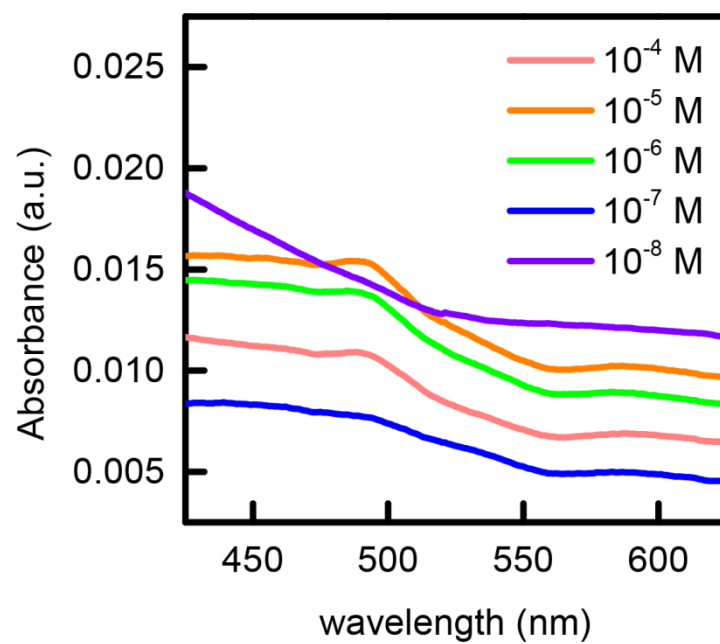

**Fig. S9** UV-vis spectra of RhB solutions after BN/Ag adsorption.

10.

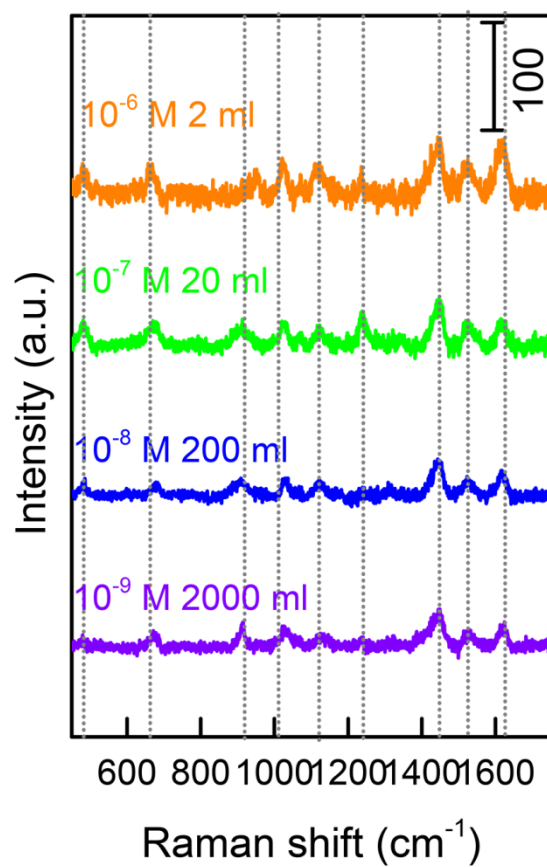

**Fig. S10** Raman spectra of the solutions with the same amount of MB but at different concentrations and volumes.

11.

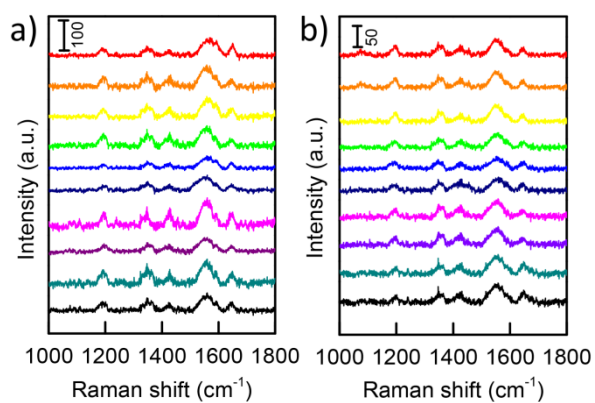

**Fig. S11** a) Raman spectra of RhB ( $10^{-6}$  M) on ten different spots of BN/Ag membrane. b) Raman spectra of RhB ( $10^{-6}$  M) on ten different parts of BN/Ag membrane after 10-cycles reusability test.

12.

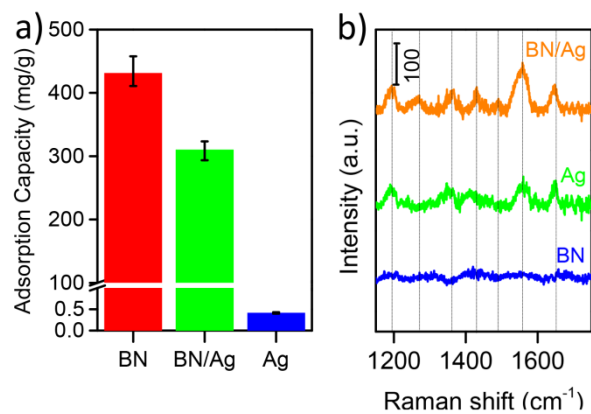

**Fig. S12** a) Adsorption capacities of BN, BN/Ag and Ag NPs. b) Raman spectra of RhB ( $10^{-6}$  M) on BN/Ag, Ag NPs and BN.
